# Supplementary material
Source: MDPI journal article supplement (https://www.mdpi.com/2073-4441/15/10/1881)
Supplement: s1 [file s1]

## Supplementary Information (SI)

### Comparison of Phenol Adsorption Property and Mechanism onto Different Moroccan Clays

*Authors, Younes Dehmani <sup>1,\*</sup>, Dison S. P. Franco <sup>2</sup>, Jordana Georgin <sup>2</sup>, Taibi Lamhasni <sup>3</sup>, Younes Brahmi <sup>4</sup>, Rachid Oukhrib <sup>5</sup>, Belfaquir Mustapha <sup>6</sup>, Hamou Moussout <sup>6</sup>, Hassan Ouallal <sup>7</sup> and Abouarnadasse Sadik <sup>1</sup>*

*1 Laboratory of Chemistry and Biology Applied to the Environment, Faculty of Sciences of Meknes, Moulay Ismail University, Meknes 50050, Morocco; abouarnadasse@yahoo.fr*

*2 Department of Civil and Environmental. Universidad de la Costa, CUC, Calle 58 # 55–66, Barranquilla, Colombia; francodison@gmail.com (D.S.P.F.); jordanageorgin89@gmail.com (J.G.)*

*3 Institut National des Sciences de l'Archéologie et du Patrimoine (INSAP), BP 6828, Madinat al Irfane, Avenue Allal El Fassi, Angle rues 5 et 7, Rabat-Instituts, Rabat 10000, Morocco; t.lamhasni@gmail.com*

*4 HTMR-Lab, Mohammed VI Polytechnic University (UM6P), Benguerir 43150, Morocco; younes.brahmi@um6p.ma*

*5 Team of Physical Chemistry and Environment, Faculty of Sciences, IBN ZOHR University, Agadir 80000, Morocco; rachid.oukhrib@edu.uiz.ac.ma*

*6 Laboratory of Advanced Materials and Process Engineering, Faculty of Sciences, University Ibn Tofail, PB: 133, Kenitra 14000, Morocco; moussouthammou@gmail.com (B.M.); mbelfaquir@gmail.com (H.M.)*

*7 Laboratory of Physic-Chemistry Materials, Faculty of Sciences and Techniques, Department of Chemistry Fundamental and Applied, Moulay Ismail University, PO Bosc 509, Errachidia 52000, Morocco; hassanouallalaghbalou@gmail.com*

*\* Correspondence: dehmaniy@gmail.com; Tel.: +212-678937801*

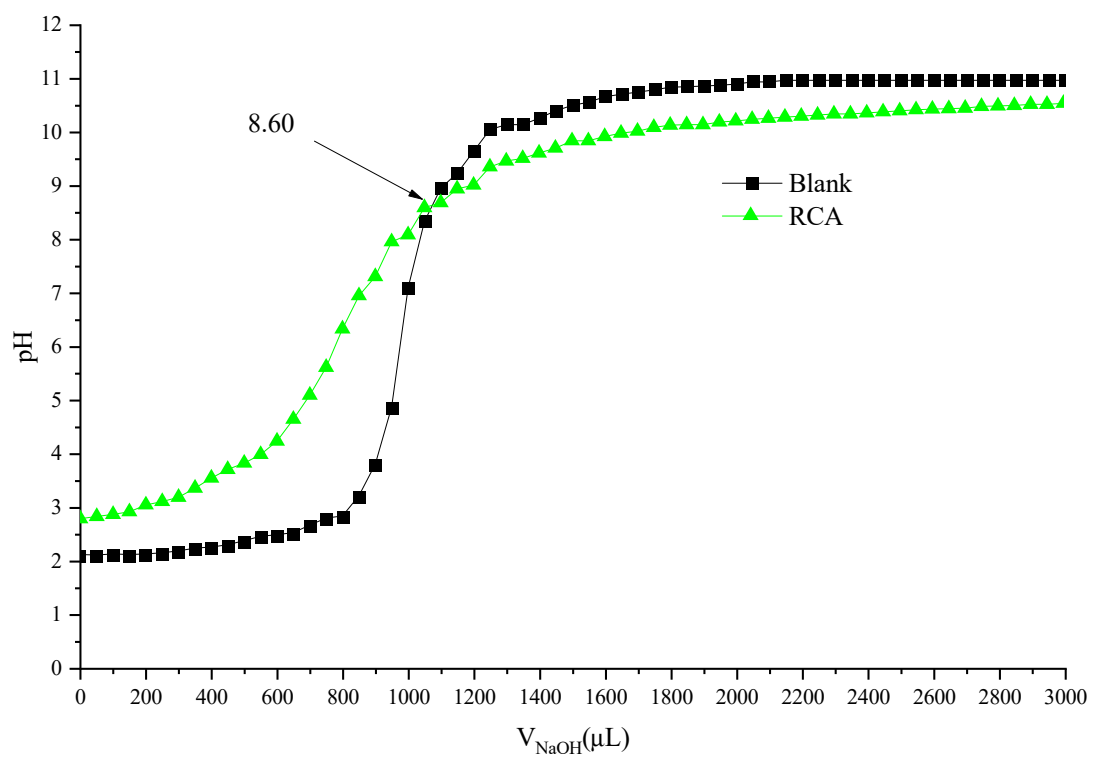

Figure S1 pH pzc of RCA

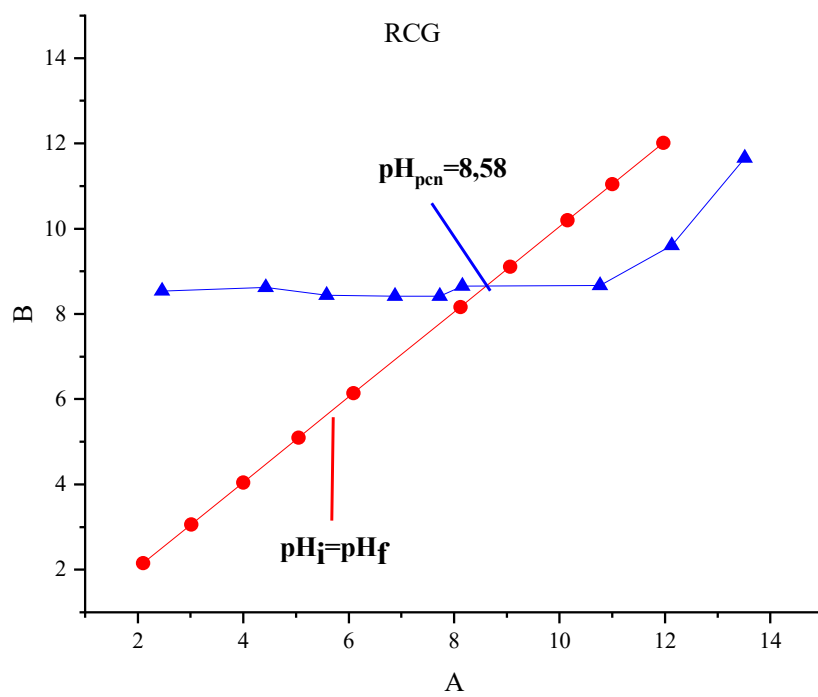

Figure S2 pH pzc of RCG

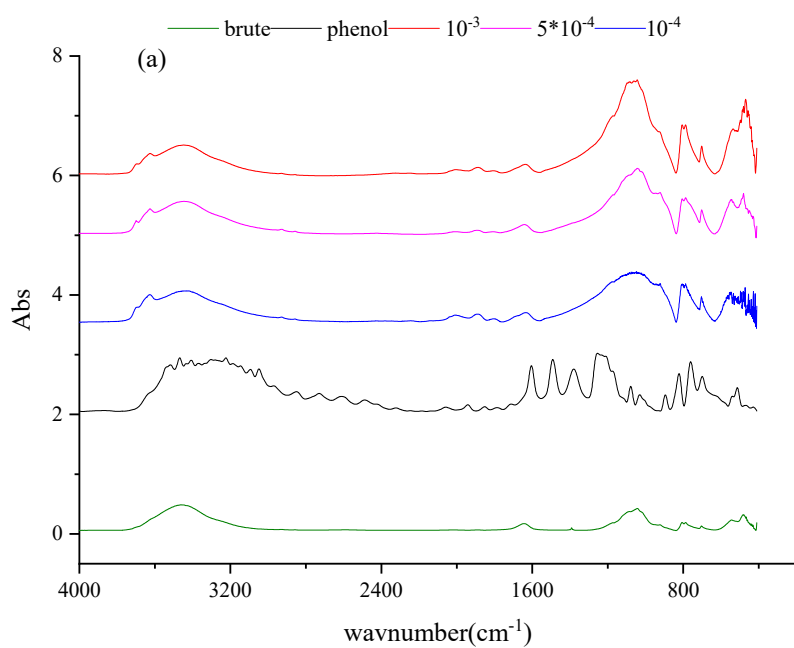

Figure S3 FTIR spectra of RCA before and after phenol adsorption.

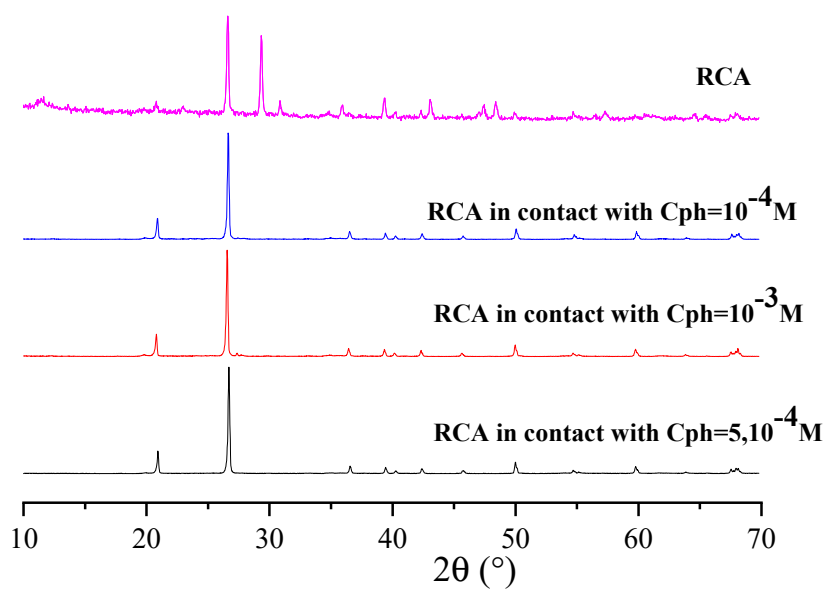

Figure S4 XRD patterns of RCA before and after phenol adsorption.

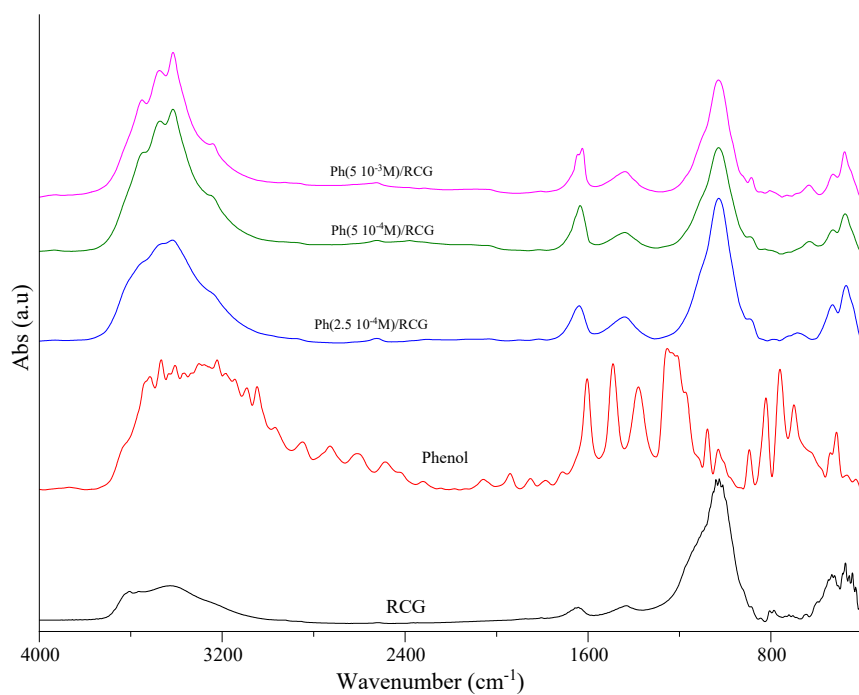

Figure S5 FTIR spectra of RCG before and after phenol adsorption.

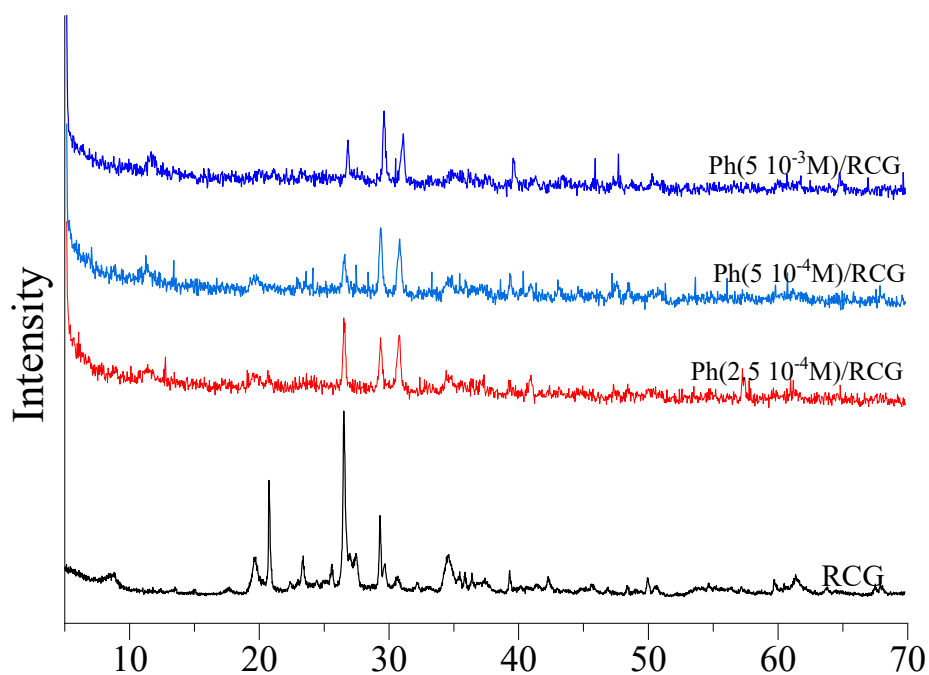

Figure S6 XRD patterns of RCG before and after phenol adsorption.
